## **Correction: Membrane associated cancer-oocyte neoantigen SAS1B/ovastacin is a candidate immunotherapeutic target for uterine tumors**

**Eusebio S. Pires, Ryan S. D'Souza, Marisa A. Needham, Austin K. Herr, Amir A. Jazaeri, Hui Li, Mark H. Stoler, Kiley L. Anderson-Knapp, Theodore Thomas, Arabinda Mandal, Alain Gougeon, Charles J. Flickinger, David E. Bruns, Brian A. Pollok, John C. Herr**

**Present:** The currently listed corresponding author, John C. Herr, is deceased. Oncotarget wishes to express our condolences to his family and colleagues.

**Corrected:** The new correspondence author information is as follows.

Original article: Oncotarget. 2015; 6(30):30194-211. doi: 10.18632/oncotarget.4734.

**Correspondence to:** Eusebio S. Pires, **email:** eusebiopires@gmail.com
